# Supplementary material for: Mitochondria transfer from mesenchymal stem cells structurally and functionally repairs renal proximal tubular epithelial cells in diabetic nephropathy in vivo
Source: PubMed Central journal article supplement (PMC6435708; doi:10.1038/s41598-019-40163-y), 2019-03-26

1 **Mitochondria transfer from mesenchymal stem cells structurally and functionally repair renal**  
2 **proximal tubular epithelial cells in diabetic nephropathy *in vivo***

3  
4 Naoto Konari, Kanna Nagaishi\*, Shin Kikuchi & Mineko Fujimiya

5 \*Corresponding author

6

7 **SUPPLEMENTARY INFORMATION**

8 **1. Supplementary Results**

9 **2. Supplementary Methods**

10 **3. Supplementary References**

11 **4. Supplementary Figure, Table and Video Legends**

12 **5. Supplementary Tables**

13 **6. Supplementary Figures**

14 **7. Supplementary Videos**

15

1 **Supplementary Results**

2 **Characterization of BM-MSCs.** BM-MSCs expressed cluster of differentiation (CD) 90 and CD44  
3 cell surface antigens, whereas CD45, CD34, CD11b, CD105 and human leukocyte antigen-DR  
4 (HLA-DR) were not expressed (Supplementary Fig. S1a, upper panels). MSCs exhibited osteogenic,  
5 adipose and chondrogenic differentiation abilities (Supplementary Fig. S1b).

6  
7 **Characterization of MtDsRed2-MSCs.** Endogenous Mt in BM-MSCs were labelled with the  
8 DsRed2 fluorescence protein by gene transfection (MtDsRed2-MSCs). The DsRed2-expressed gene  
9 was successfully transfected into BM-MSCs at a rate of ~80%. Almost all of endogenous Mt  
10 expressed DsRed2 (DsRed2-Mt) (Supplementary Figs. S1c and S1d). MtDsRed2-MSCs expressed  
11 CD90 and CD44 cell surface antigens, whereas CD45, CD34, CD11b, CD105 and HLA-DR were not  
12 expressed, and these observations were similar to that observed for non-transfected-BM-MSCs  
13 (Supplementary Fig. S1a, lower panels). Cell proliferation was similar in MtDsRed2-MSCs and  
14 non-transfected-BM-MSCs (Supplementary Fig. S1e).

15  
16 **Supplementary Methods**

17 **Isolation and culturing of rat BM-MSCs.** Bone marrow was collected from 8-week-old male SD

1 rats. BM-MSCs were harvested by adherent cultures of bone marrow cells, as described previously<sup>1</sup>.  
2 Bone marrow cells were harvested from femurs, tibias and humeri by flushing whole bone marrow  
3 with complete  $\alpha$ -Modified Eagle's Medium ( $\alpha$ -MEM; Invitrogen) containing 15% foetal bovine  
4 serum (FBS; Sigma-Aldrich) and 1% penicillin–streptomycin (PS; Thermo Fisher Scientific).  
5 Single-cell suspensions were filtered through a 100- $\mu$ m sterile filter (Becton Dickinson) and plated in  
6 150-cm<sup>2</sup> dishes. Cells were grown in complete  $\alpha$ -MEM containing 15% FBS and 1% PS at 37 °C and  
7 5% CO<sub>2</sub>. Three d after bone marrow cells seeding, the medium was replaced with fresh medium, and  
8 adherent cells grown to 80% confluency were defined as passage 0. Cells in passage 3 were used for  
9 experiments.

10

11 **Characterisation of rat BM-MSCs and MtDsRed2-MSCs.** The immune phenotype of BM-MSCs  
12 and MtDsRed2-MSCs was determined using Aria III flow cytometer (Becton Dickinson) and rat  
13 surface antigen-specific antibodies CD90, CD44, CD45, CD34, CD11b, CD105 and HLA-DR  
14 (Supplementary Table S3).

15

16 **Differentiation ability of BM-MSCs.** The differentiation ability of rat BM-MSCs was confirmed  
17 using the AdipoInducer Reagent (for animal cell) (Takara Bio Inc., Shiga, Japan) for adipogenic

1 differentiation ability and the Rat Mesenchymal Stem Cell Functional Identification Kit (R&D  
2 systems Inc., Minneapolis, MN) for osteogenic and chondrogenic differentiation abilities, following  
3 the manufacturer's instructions. Adipocytes, osteocytes and chondrocytes were detected by  
4 immunofluorescence staining using the goat anti-FABP4 antibody, mouse anti-osteocalcin antibody  
5 and goat anti-aggrecan antibody, respectively. Alexa 488 conjugated anti-goat IgG or Alexa 488  
6 conjugated anti-mouse IgG were used as secondary antibodies. Nuclei were stained with DAPI and  
7 observed by confocal laser-scanning microscopy (Nikon A1).

8

9 **Proliferation assay of BM-MSCs and MtDsRed2-MSCs.** Proliferation of BM-MSCs and  
10 MtDsRed2-MSCs was analysed using the Cell Counting Kit-8 (CCK-8; Dojindo Laboratories). A  
11 total of  $3 \times 10^3$  cells were cultured in each well of a 96-well cell culture plate (Corning Costar;  
12 Sigma-Aldrich) for 48 and 72 h. Triplicate wells were used for each sample. Cells were treated with  
13 10  $\mu$ L of tetrazolium salt (WST-8) in each well for another 2 h. The absorbance at 450 nm (A450)  
14 was measured with a microplate reader (Infinite M1000 Pro; TECAN).

15

16 **Isolation and primary culturing of rat PTECs.** PTECs were prepared according to a protocol  
17 reported previously<sup>2</sup> for evaluating Mt transfer from BM-MSCs to PTECs or the direct effect of

1 isolated Mt alone on PTECs *in vitro*. Kidneys were removed from Control or STZ rats and minced  
2 with scissors in a solution of 1 mg/mL collagenase (Sigma-Aldrich) diluted in sterile PBS and  
3 incubated for 30 min at 37 °C. Dissolved tissue was filtered with a 100-µm pore cell strainer and  
4 centrifuged at 400 × g for 5 min. The cell pellet was treated with RBC lysis buffer (Qiagen, Hilden,  
5 Germany). Next, cells were plated onto appropriately sized culture dishes or chamber slides at a  
6 density of  $2.5 \times 10^5$  cells/cm<sup>2</sup> and cultured with DMEM/F-12 (Thermo Fisher Scientific) containing  
7 10% FBS, 1% PS, Insulin-Transferrin-Selenium-X (Invitrogen), prostaglandin E1 ( $7.1 \times 10^{-8}$  M;  
8 Sigma-Aldrich), triiodothyronine ( $2.0 \times 10^{-9}$  M; Sigma-Aldrich) and dexamethasone ( $5.09 \times 10^{-8}$  M;  
9 Sigma-Aldrich), and incubated at 37 °C in 5% CO<sub>2</sub> for 48 h. The medium was replaced 48 h after  
10 initial plating. Phase contrast images of cultured PTECs were observed with an Eclipse TE200  
11 (Nikon).

12  
13 **Transmission electron microscopy.** The pellet of isolated Mt from BM-MSCs was fixed in 2%  
14 paraformaldehyde (PFA) and 2% glutaraldehyde (Wako Pure Chemical Industries) in 0.1 M  
15 cacodylate buffer overnight at 4 °C. Next, the pellet was post-fixed with 1% osmium tetroxide  
16 (TAAB Laboratories Equipment, Aldermaston, UK) and embedded with epoxy resin (EPON812,  
17 TAAB Laboratories Equipment). Ultra-thin sections (70 nm) were cut with an ultramicrotome (RMT,

1 Tucson, AZ), stained with uranyl acetate and lead citrate and observed by transmission electron  
2 microscopy (Hitachi High-Technologies Corporation).

3  
4 **Immunofluorescence staining.** Kidney samples were fixed with 4% PFA, immersed in O.C.T.  
5 compound (Sakura Finetek USA, Torrance, CA) and cryosectioned to 20  $\mu\text{m}$ . Frozen sections were  
6 permeabilised with PBST for 3 d at 4  $^{\circ}\text{C}$ . After permeabilisation, sections were incubated in 2.5%  
7 donkey serum in PBS for 1 h at RT and then incubated with primary antibodies (Supplementary  
8 Table S1) overnight at 4  $^{\circ}\text{C}$ . Sections were then washed with PBST and incubated with secondary  
9 antibodies (Supplementary Table S1) for 2 h at RT. Nuclei were stained with DAPI (Dojindo  
10 Laboratories). Sections were observed by confocal laser-scanning microscopy (Nikon A1).

11 PTECs and NRK-52E cells cultured *in vitro* were fixed with 4% PFA and permeabilised  
12 with 0.3% PBST for 10 min at RT. Cells were washed with PBS and incubated in Biotin-Blocking  
13 Solution (ScyTek Laboratories, Logan, UT) to block endogenous biotin expression. Cells were then  
14 washed with PBS and incubated with primary antibodies (Supplementary Table S1) for 1 h at RT, and  
15 subsequently washed again with PBS and incubated with secondary antibodies (Supplementary Table  
16 S1) for 30 min at RT. Nuclei were stained with DAPI. Cells were observed by confocal  
17 laser-scanning microscopy (Nikon A1).

1

2 **Immunoblotting.** Protein expression in STZ-PTECs and NRK-52E cells was analysed by  
3 immunoblotting. Protein expression in cytosol-enriched and Mt-enriched fractions of STZ-PTECs  
4 were analysed separately by obtaining these fractions using centrifugation methods. Cells were  
5 collected and pelleted by centrifugation at  $2300 \times g$  for 5 min. The Mt fraction was collected as  
6 described previously<sup>3</sup>. The supernatant of the cell pellet was centrifuged at  $10000 \times g$  for 15 min to  
7 obtain the cytosol-enriched fraction. Each fraction was lysed in the radioimmunoprecipitation assay  
8 buffer containing 20 mM Tris-HCl, pH 7.4, 150 mM sodium chloride, 1 mM EDTA (Sigma-Aldrich),  
9 pH 8.0, 0.1% (w/v) sodium dodecyl sulfate, 0.1% sodium deoxycholate, 1% Triton X-100, complete  
10 Mini™ (Roche Diagnostics, Basel, Switzerland) and Phos STOP (Roche Diagnostics). After  
11 measuring protein concentrations using the bicinchoninic acid Protein Assay Kit (Thermo Fisher  
12 Scientific), 5–40  $\mu$ g of protein obtained from each fraction was separated on a 12% denaturing  
13 polyacrylamide gel before transfer to a polyvinylidene difluoride membrane. After blocking with 5%  
14 non-fat dry milk in Tris-buffered saline supplemented with Tween 20, the membrane was incubated  
15 with primary antibodies (Supplementary Table S2) overnight at 4 °C. Subsequently, the membrane  
16 was incubated with horseradish peroxidase-conjugated secondary antibodies (Supplementary Table  
17 S2) for 1 h at RT. Immunoreactivity was developed using an Enhanced Chemiluminescence Kit (GE

1 Healthcare, Amersham, UK).

2

### 3 **Supplementary References**

4 1 Javazon, E. H., Colter, D. C., Schwarz, E. J. & Prockop, D. J. Rat marrow stromal cells are more  
5 sensitive to plating density and expand more rapidly from single-cell-derived colonies than human  
6 marrow stromal cells. *Stem Cells* **19**, 219-225, doi:10.1634/stemcells.19-3-219 (2001).

7 2 Nagaishi, K. *et al.* Mesenchymal stem cell therapy ameliorates diabetic nephropathy via the  
8 paracrine effect of renal trophic factors including exosomes. *Sci Rep* **6**, 34842,  
9 doi:10.1038/srep34842 (2016).

10 3 Kitani, T., Kami, D., Matoba, S. & Gojo, S. Internalization of isolated functional mitochondria:  
11 involvement of macropinocytosis. *Journal of cellular and molecular medicine* **18**, 1694-1703,  
12 doi:10.1111/jcmm.12316 (2014).

13

### 14 **Supplementary Figure Legends**

15 **Supplementary Figure S1.** Characteristics of BM-MSCs and MtDsRed2-MSCs. (a) Flow cytometry  
16 analysis of cell surface marker expression in non-transfected-BM-MSCs and MtDsRed2-MSCs. The  
17 red histogram summarizes the results for the population stained with the target antibody, whereas the



1 blue histogram summarizes the results for the population stained with the isotype control antibody.  
2 Experiments were repeated three times independently. **(b)** Adipogenic, osteogenic and chondrogenic  
3 differentiation of BM-MSCs. Nuclei are counterstained with DAPI (blue). Scale bar, 20  $\mu\text{m}$ . **(c)** Flow  
4 cytometry analysis of DsRed2 expression in MtDsRed2-MSCs. The red histogram summarizes the  
5 results for MtDsRed2-MSCs and the blue histogram summarizes the results for  
6 non-transfected-BM-MSCs. **(d)** Morphological findings of BM-MSCs, as indicated by phase contrast  
7 images and expression of DsRed2 in BM-MSCs. Non-transfected-BM-MSCs are shown in the left  
8 panel and MtDsRed2-MSCs are shown in the middle panel. Scale bar, 100  $\mu\text{m}$ . A single cell image of  
9 MtDsRed2-MSCs is shown in the right panel under high magnification. A nucleus is counterstained  
10 with DAPI (blue). Scale bar, 10 nm. **(e)** Cell proliferative ability of non-transfected-BM-MSCs and  
11 MtDsRed2-MSCs. Absorbance at 450 nm was measured 0, 48 and 72 h after commencing cell  
12 culturing. Data are shown as mean  $\pm$  s.e.m. ( $n = 3$  per group).

13

14 **Supplementary Figure S2.** Images of isolated DsRed2-Mt and viability of isolated Mt **(a)**

15 Fluorescence image of DsRed2-Mt isolated from MtDsRed2-MSCs. Scale bar, 5  $\mu\text{m}$ . **(b)** A

16 transmission electron microscopic image of DsRed2-Mt isolated from MtDsRed2-MSCs. Scale bar,

17 200 nm. **(c)** Oxygen consumption rate of isolated Mt. Rates of the slope signal change were

1 normalized against the initial intensity.

2

3 **Supplementary Figure S3.** Quantity-dependent incorporation rate of DsRed2-Mt in Control-PTECs  
4 and STZ-PTECs. Differences in incorporation rates of DsRed2-Mt into Control-PTECs and  
5 STZ-PTECs are shown for each additional amount of DsRed2-Mt. The amount of Mt shows the ratio  
6 to the number of Control-PTECs or STZ-PTECs when isolated Mt were added. Data are shown as  
7 mean  $\pm$  s.e.m. ( $n = 3$  per group). \* $P < 0.05$  STZ-PTECs vs. Control-PTECs using the unpaired t-test.

8

9 **Supplementary Figure S4.** SOD1 expression in the cytosol-enriched fraction of STZ-PTECs  
10 cultured with or without isolated Mt *in vitro*. (a) Western blotting analysis of SOD1 expression in  
11 STZ-PTECs 24 h after the addition of isolated Mt ( $n = 4$  per group). Cropped images of immunoblots  
12 are shown here, and full-length blots are shown in Supplementary Fig. S7c. (b) Densitometric  
13 analysis of SOD1 expression in STZ-PTECs 24 h after the addition of isolated Mt. Data are shown as  
14 mean  $\pm$  s.e.m. ( $n = 4$  per group).

15

16 **Supplementary Figure S5.** Three-dimensional images of kidney sections of STZ rats injected with  
17 isolated DsRed2-Mt under the renal capsule. Immunofluorescence images of megalin expression

1 (green) and DsRed2-Mt (red) in proximal tubules. Nuclei are counterstained with DAPI (blue). Red  
2 and yellow lines indicate the same position in images at each time point.

3  
4 **Supplementary Figure S6.** Distribution of isolated Mt in the kidney of control rats injected with  
5 DsRed2-Mt under the renal capsule. **(a)** Experimental protocol for the injection of isolated Mt in  
6 control rats. Isolated DsRed2-Mt obtained from  $1 \times 10^6$  MtDsRed2-MSCs were injected under the  
7 renal capsule in each side of the kidney ( $n = 3$  per group). **(b)** Immunofluorescence images of  
8 megalin (green) expression and DsRed2-Mt (red) in proximal tubules. Nuclei are counterstained with  
9 DAPI (blue). PT, proximal tubules. Scale bar, 20  $\mu\text{m}$ .

10

11 **Supplementary Figure S7.** Full unedited gels from Figs. 4a, 5a and S4a. **(a)** Full unedited gel from  
12 Fig. 4a. **(b)** Full unedited gel from Fig. 5a. **(c)** Full unedited gel from Supplementary Fig. S4a.

13

#### 14 **Supplementary Table Captions**

15 **Supplementary Table S1.** Primary and secondary antibodies used for immunofluorescence staining.

16 **Supplementary Table S2.** Primary and secondary antibodies used for western blotting analysis.

17 **Supplementary Table S3.** Primary and secondary antibodies used for flow cytometry analysis.

1

2 **Supplementary Video Legends**

3 **Supplementary Video S1.** Time-lapse observation of STZ-PTECs co-cultured with

4 MtDsRed2-MSCs. The time-lapse observation started 12 h after commencing the co-culture. The

5 yellow arrow tracks the same MtDsRed2-MSC-derived Mt (red).

6

7 **Supplementary Video S2.** Time-lapse observation of STZ-PTECs co-cultured with

8 MtDsRed2-MSCs. The time-lapse observation started 12 h after commencing the co-culture. The

9 yellow arrow tracks the same MtDsRed2-MSC-derived Mt (red).

10

11 **Supplementary Video S3.** Time-lapse observation of STZ-PTECs co-cultured with DsRed2-Mt

12 (red) isolated from MtDsRed2-MSCs. The time-lapse observation started 12 h after the addition of

13 DsRed2-Mt. The yellow arrow tracks the same isolated DsRed2-Mt (red).

14

15 **Supplementary Video S4.** Time-lapse observation of STZ-PTECs co-cultured with DsRed2-Mt

16 (red) isolated from MtDsRed2-MSCs. The time-lapse observation started 12 h after the addition of

17 DsRed2-Mt.

1 **Supplementary Table S1.** Primary and secondary antibodies used for immunofluorescence staining.

| Antibody                                | Species | Reactivity | Manufacturer                              | No.         | Dilution               |
|-----------------------------------------|---------|------------|-------------------------------------------|-------------|------------------------|
| <b>Primary antibodies</b>               |         |            |                                           |             |                        |
| DsRed2                                  | Rab     |            | Clontech<br>Laboratories                  | 632496      | 1:250                  |
| Collagen IV                             | Rab     | Ms, Rt     | Abcam                                     | ab19808     | 1:100                  |
| Megalin                                 | Rab     | Ms, Hu, Mk | Abcam                                     | ab76969     | 1:500 (T)<br>1:200 (C) |
| Megalin                                 | Goat    | Ms, Rt     | Santa Cruz<br>Biotechnology               | Sc-16478    | 1:50                   |
| Biotinylated LTL                        |         |            | Vector Laboratories                       | B-1325      | 1:30                   |
| SGLT2 (SLC5A2)                          | Rab     | Hu         | EPIGENTEK                                 | A63450      | 1:100                  |
| PGC-1 $\alpha$                          | Rab     | Ms, Rt, Hu | Novus Biologicals                         | NBP1-04676  | 1:200                  |
| <b>Secondary antibodies</b>             |         |            |                                           |             |                        |
| Alexa 488 conjugated<br>anti-rabbit IgG | Dky     | Rab        | Jackson<br>ImmunoResearch<br>Laboratories | 711-545-152 | 1:500 (T)<br>1:200 (C) |
| Cy3 conjugated<br>Anti-goat IgG         | Dky     | Gt         | MERCK                                     | AP180C      | 1:500                  |
| Alexa 488 Conjugated<br>streptavidin    |         |            | Jackson<br>ImmunoResearch<br>Laboratories | 016-540-084 | 1:500                  |

Ms, mouse; Rt, rat; Rab, rabbit; Hu, human; Mk, monkey; Gt, goat; Dky, donkey;  
(T), for tissues; (C), for cells

2

1 **Supplementary Table S2.** Primary and secondary antibodies used for western blotting analysis.

| Antibody                       | Species | Molecular weight (kDa) | Manufacturer              | No.        | Dilution |
|--------------------------------|---------|------------------------|---------------------------|------------|----------|
| <b>Primary antibodies</b>      |         |                        |                           |            |          |
| SOD1                           | Rab     | 17                     | Abcam                     | ab16831    | 1:2000   |
| SOD2                           | Rab     | 22                     | Cell Signaling Technology | 13141      | 1:2000   |
| Bcl-2                          | Ms      | 26                     | Santa Cruz Biotechnology  | sc-7382    | 1:200    |
| Bax                            | Ms      | 21                     | Proteintech               | 60267-1-1g | 1:2000   |
| $\beta$ -actin                 | Ms      | 42                     | Sigma-Aldrich             | A5441      | 1:5000   |
| VDAC1                          | Rab     | 31                     | Abcam                     | ab154856   | 1:5000   |
| <b>Secondary antibodies</b>    |         |                        |                           |            |          |
| HRP conjugated anti-mouse IgG  | Sh      |                        | GE healthcare             | NA931V     | 1:2000   |
| HRP conjugated anti-rabbit IgG | Dky     |                        | GE healthcare             | NA934V     | 1:2000   |

Ms, mouse; Rab, rabbit; Sh, sheep; Dky, donkey.

2

1 **Supplementary Table S3.** Primary and secondary antibodies used for flow cytometry analysis.

| Antibody                        | Species | Reactivity         | Manufacturer  | No.      | Dilution |
|---------------------------------|---------|--------------------|---------------|----------|----------|
| <b>Primary antibodies</b>       |         |                    |               |          |          |
| CD90                            | Ms      | Rt, Ms             | BioLegend     | 202501   | 1:100    |
| CD44                            | Ms      | Rt                 | BioLegend     | 203901   | 1:100    |
| CD45                            | Ms      | Rt                 | BioLegend     | 202201   | 1:100    |
| CD34                            | Rab     | Hu, Rt, Ms         | Bioss         | bs-2038R | 1:100    |
| CD11b                           | Ms      | Rt                 | Chemicon      | CBL1512  | 1:100    |
| CD105                           | Ms      | Hu, Rt, Ms, Dg, Mk | Abcam         | ab156756 | 1:100    |
| HLA-DR                          | Ms      | Rt                 | BioLegend     | 205301   | 1:100    |
| <b>Isotype control</b>          |         |                    |               |          |          |
| Mouse IgG1, κ                   | Ms      |                    | BD Bioscience | 556648   | 1:100    |
| Mouse IgG2a, κ                  | Ms      |                    | BD Bioscience | 556651   | 1:100    |
| Mouse IgG2b, κ                  | Ms      |                    | BioLegend     | 401201   | 1:100    |
| Rabbit IgG                      | Rab     |                    | BioLegend     | 910801   | 1:100    |
| <b>Secondary antibodies</b>     |         |                    |               |          |          |
| FITC conjugated anti-mouse IgG  | Gt      | Ms                 | MERCK         | AP127F   | 1:50     |
| FITC conjugated anti-rabbit IgG | Dky     | Rab                | MERCK         | AP182F   | 1:50     |

Ms, mouse; Rt, rat; Rab, rabbit; Hu, human; Dg, dog; Mk, monkey; Gt, goat; Dky, donkey.

2

3

4

5

6

7

Supplementary Figure S1

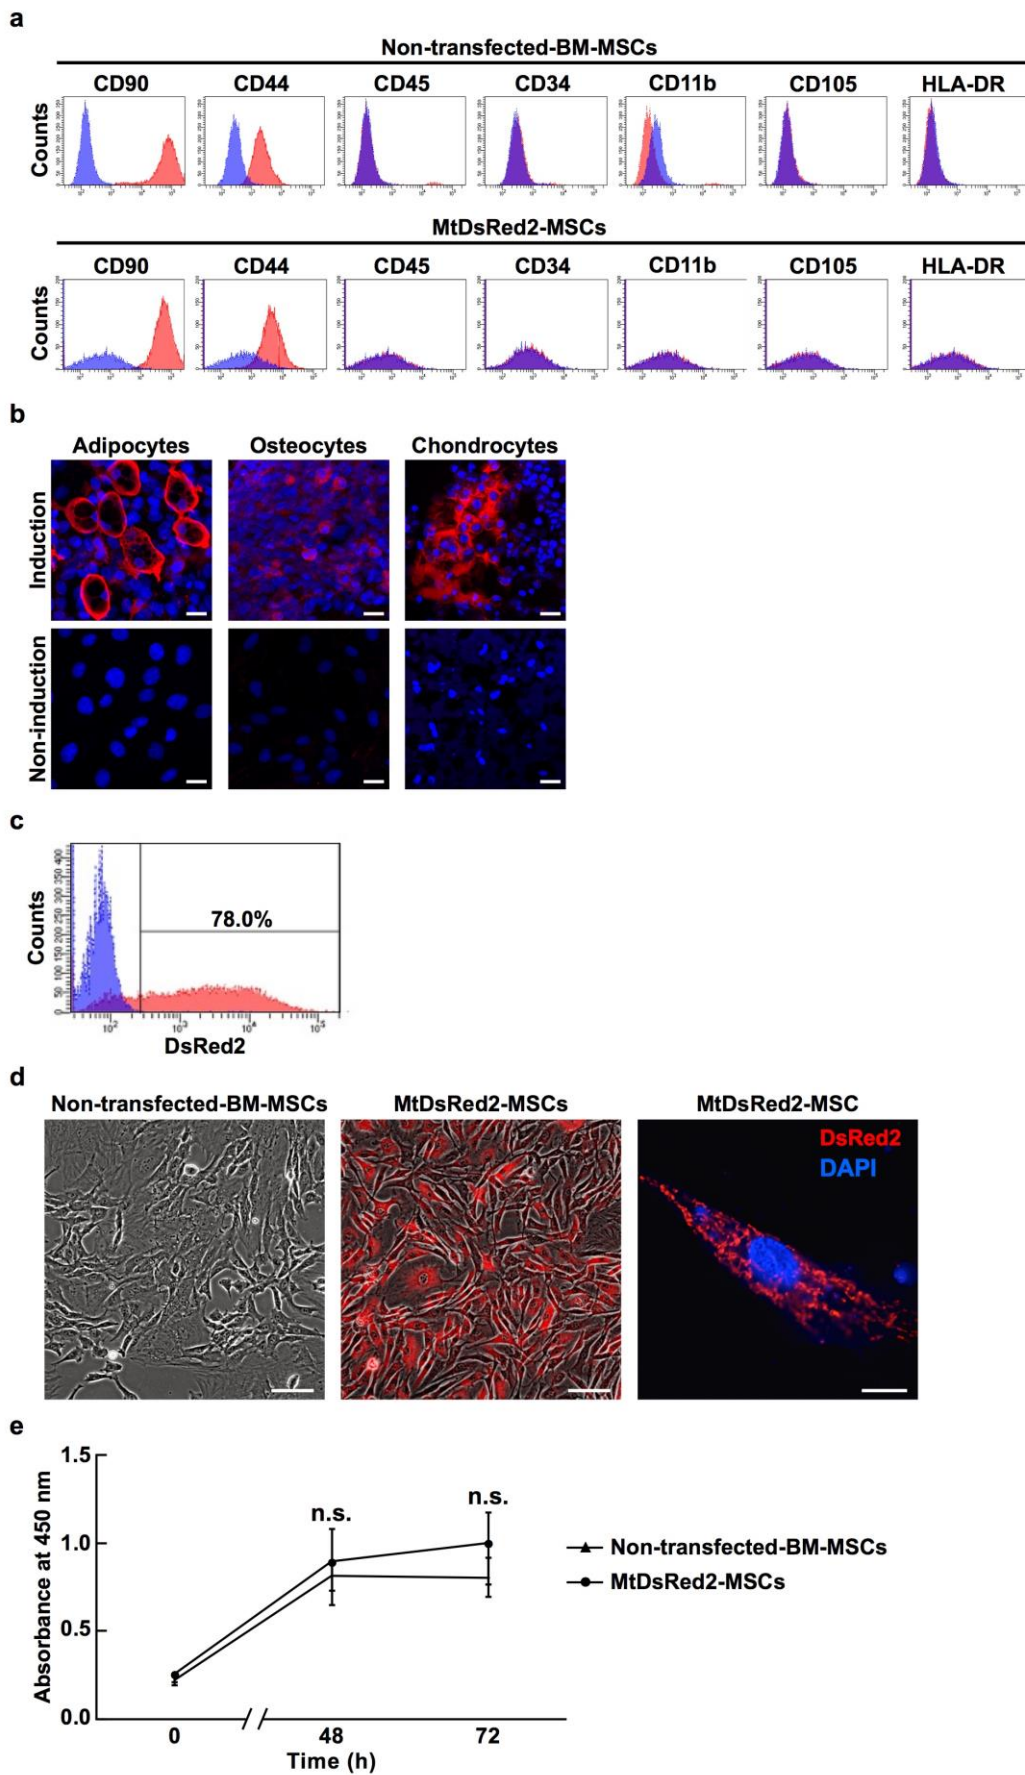



Supplementary Figure S2

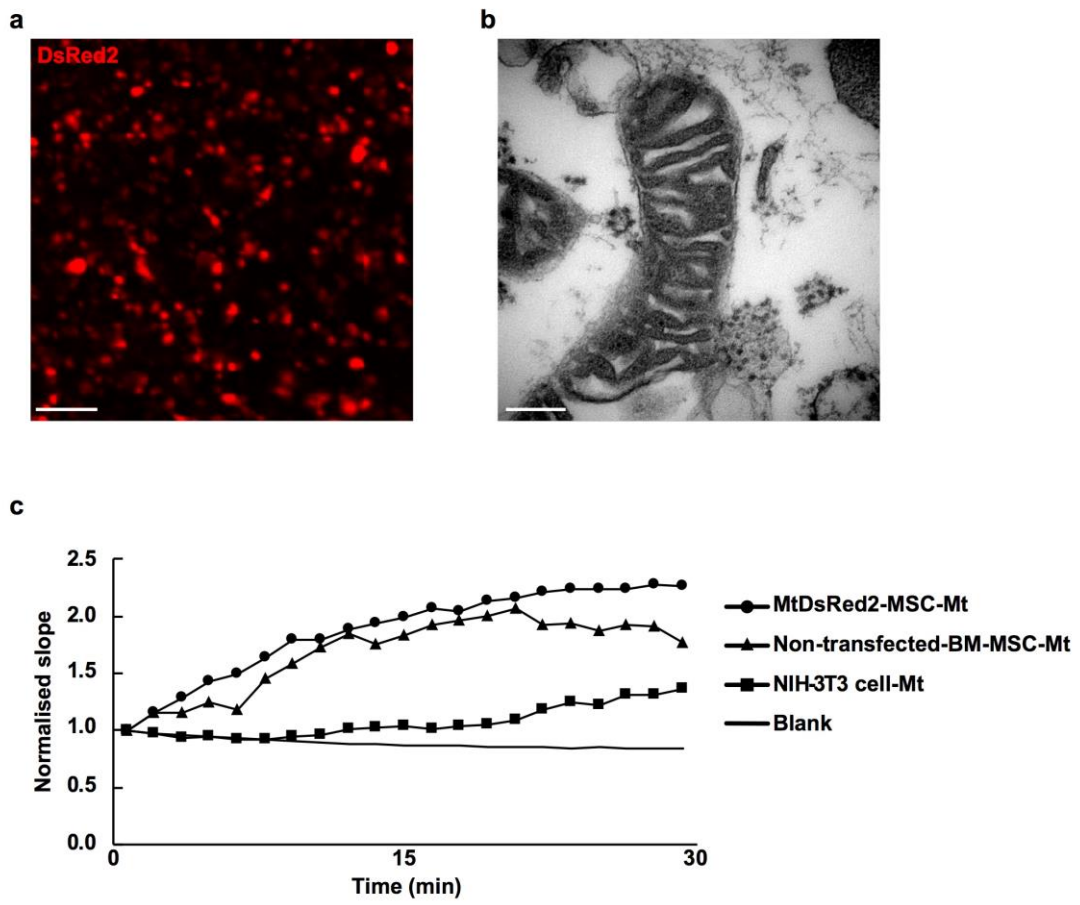

Supplementary Figure S3

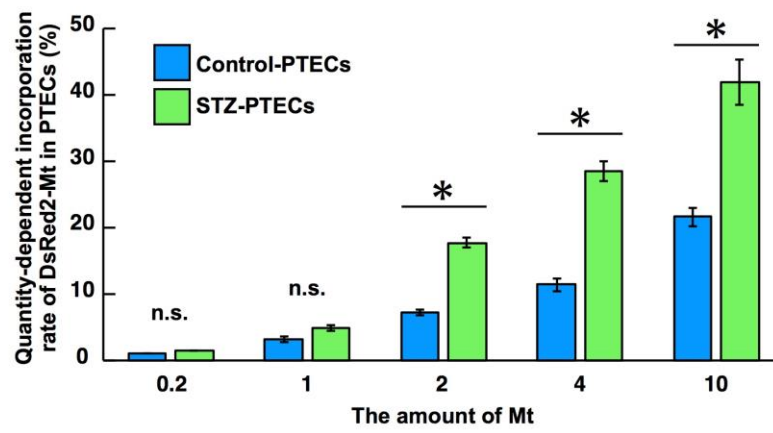

Supplementary Figure S4

a

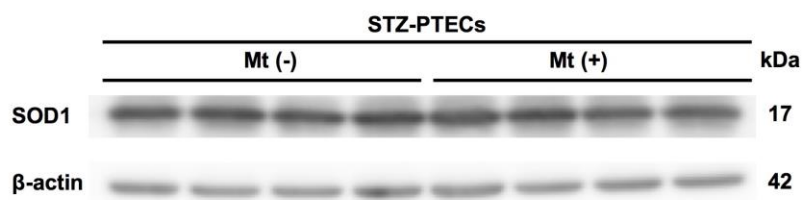

b

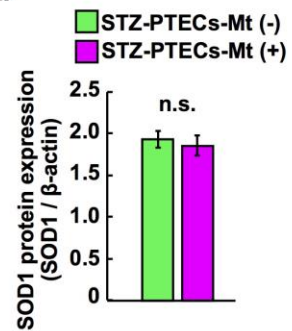

Supplementary Figure S5

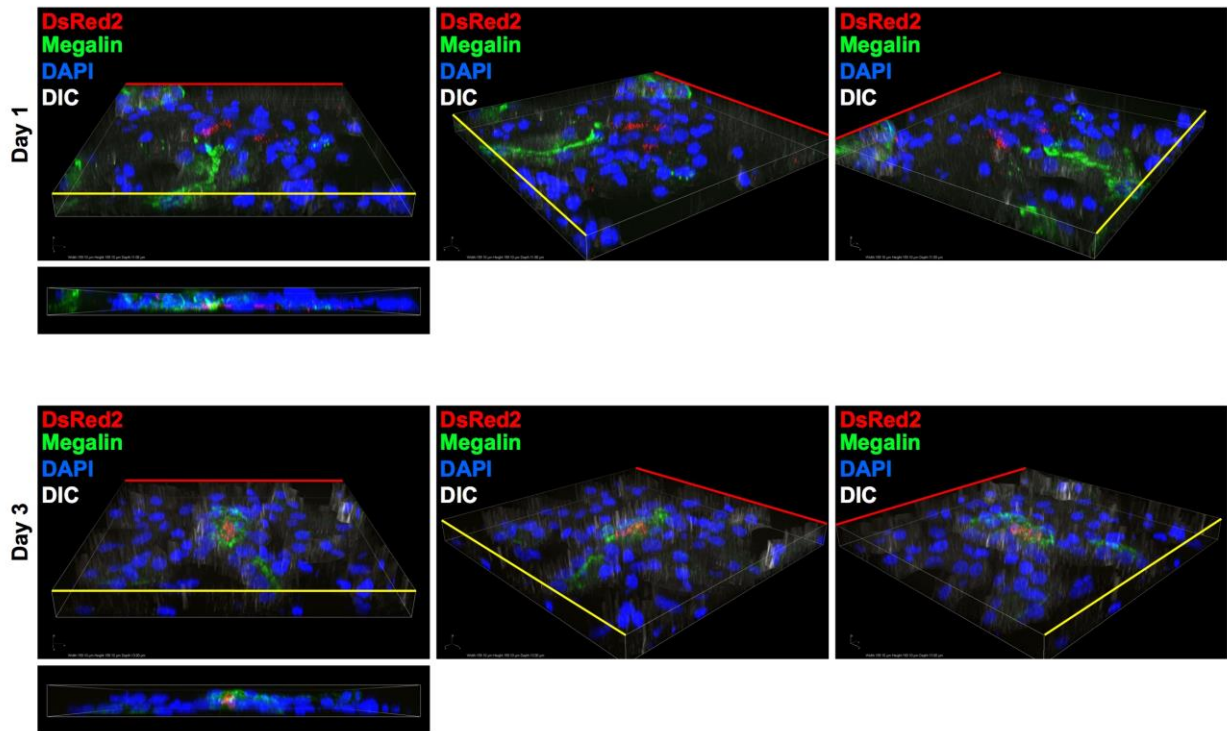

Supplementary Figure S6

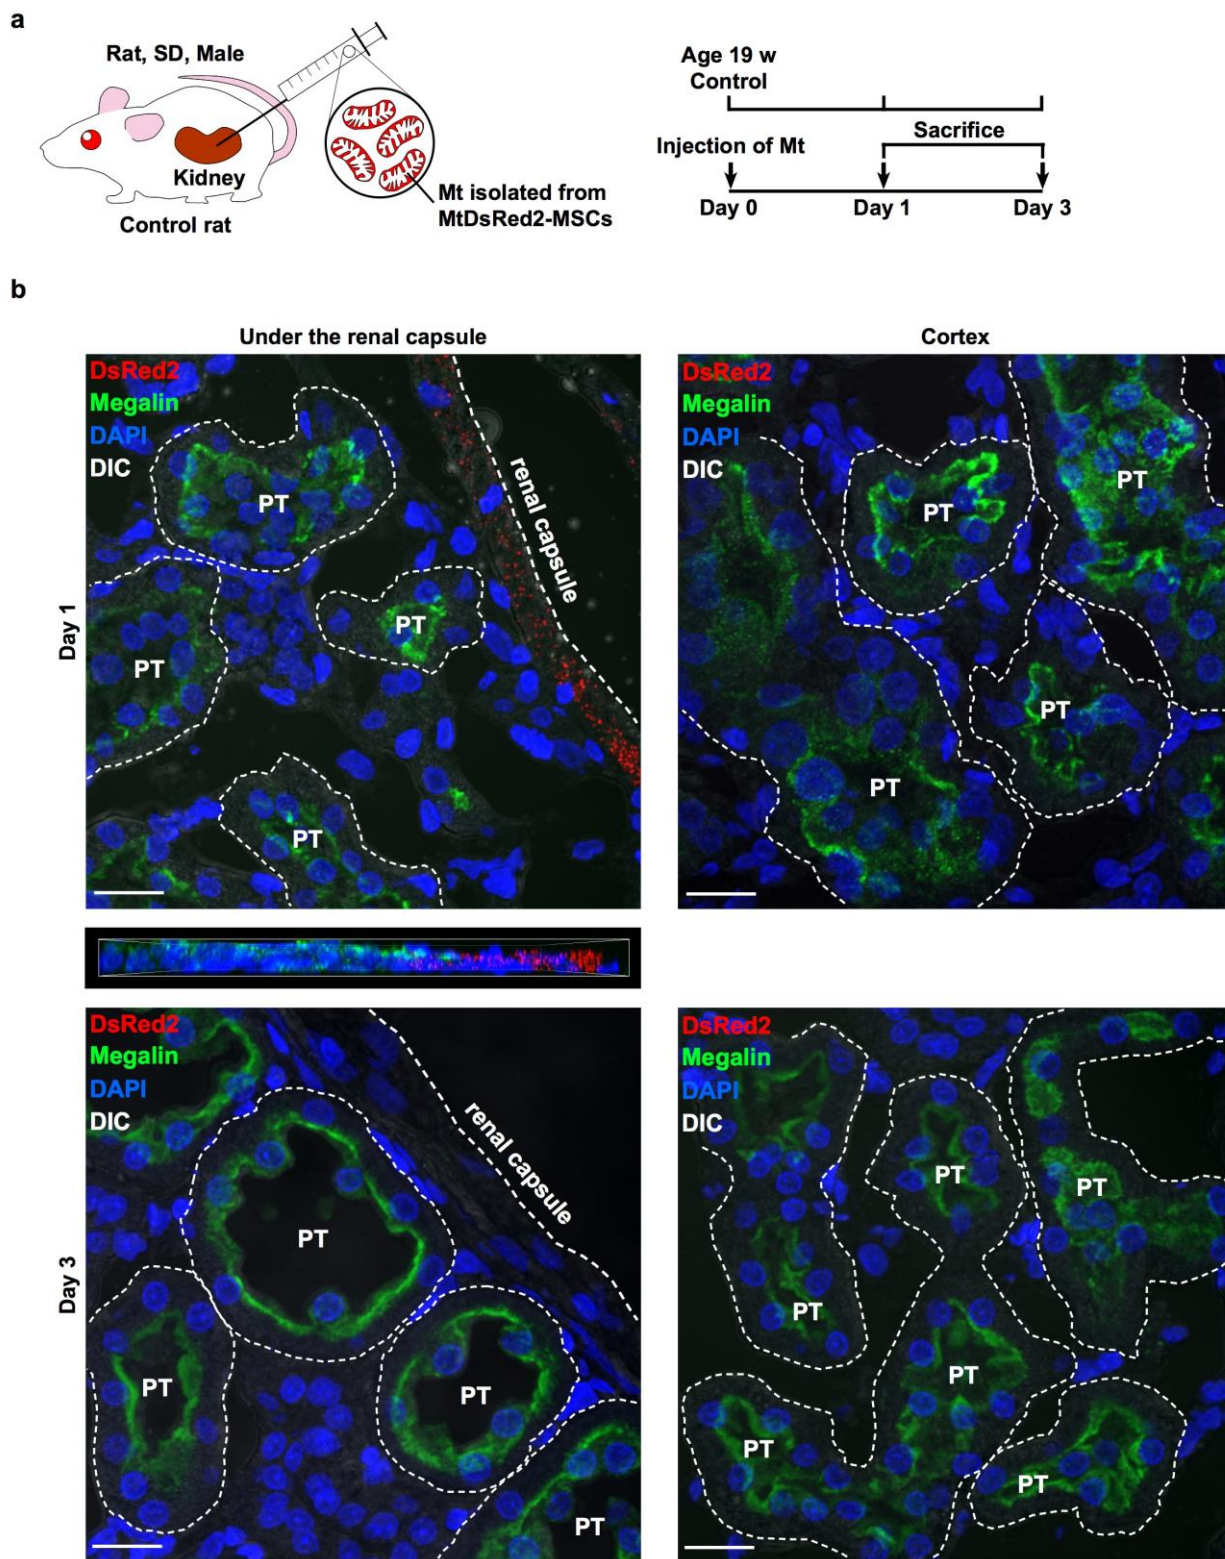

Supplementary Figure S7

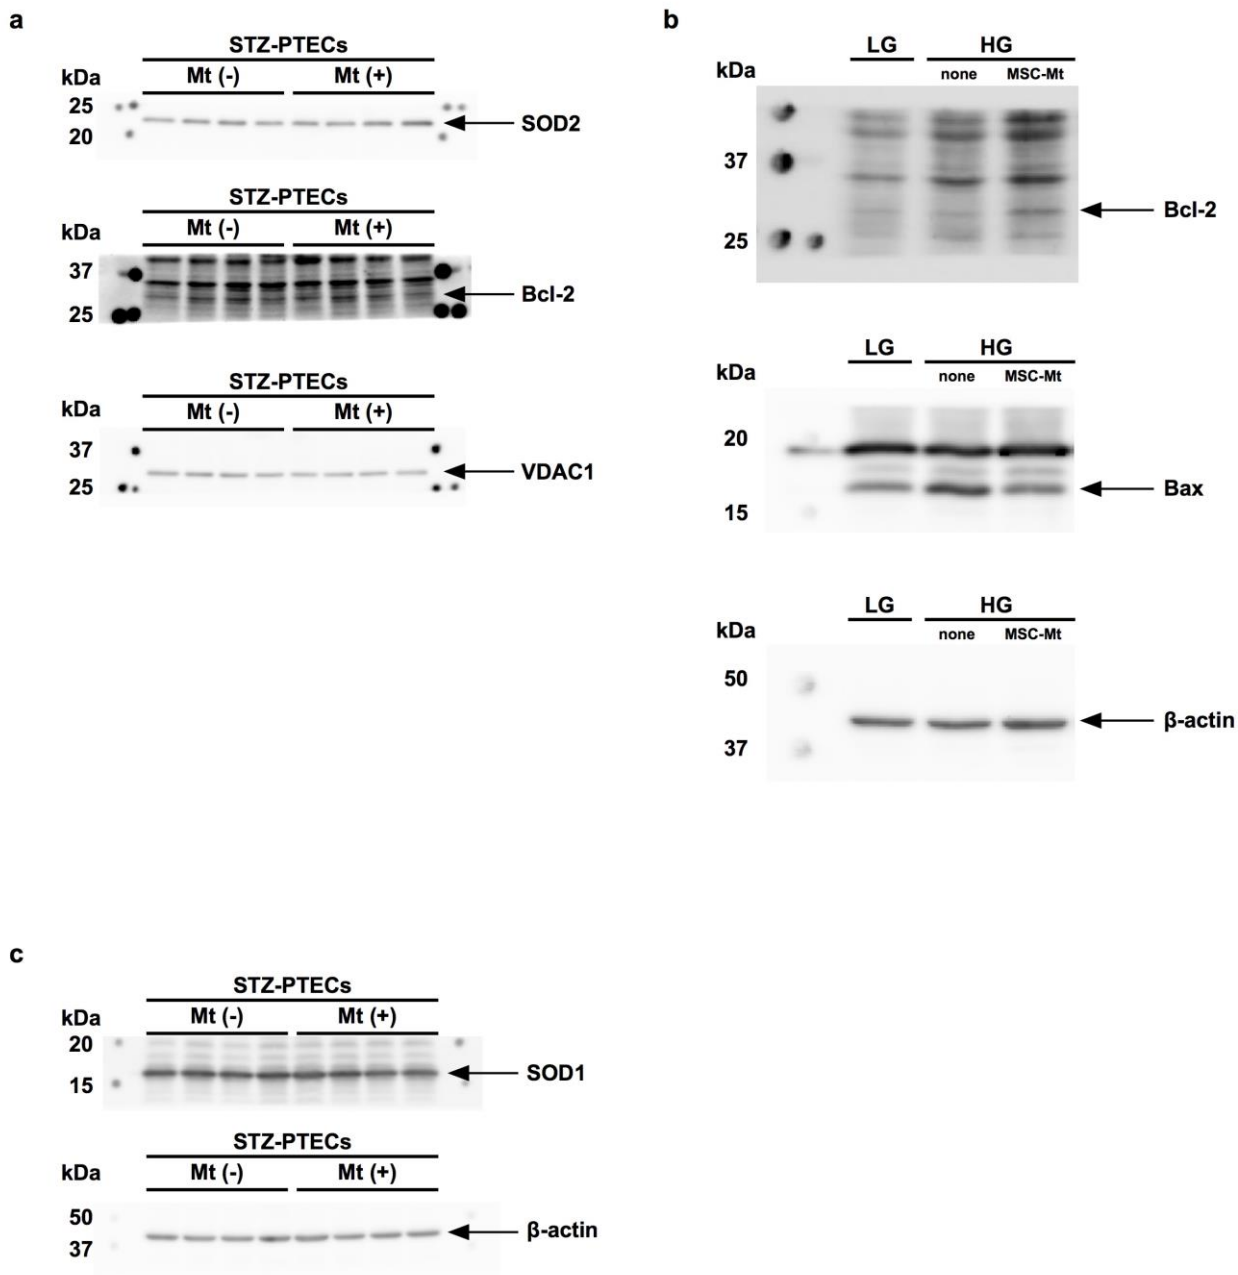

Supplement: 41598_2019_40163_MOESM1_ESM.pdf [file 41598_2019_40163_MOESM1_ESM.pdf]
